# Supplementary material for: Effect of sorafenib starting dose and dose intensity on survival in patients with hepatocellular carcinoma: Results from a Canadian Multicenter Database
Source: PubMed Central journal article supplement (PMC7367626; doi:10.1002/cam4.3228), 2020-06-11
Supplement: CAM4-9-4918-s001.pdf [file CAM4-9-4918-s001.pdf]

**Appendix Table A: Standardized differences of baseline covariates in original and matched sample**

| Variable                        | Original sample ( n=681) |                          |          | Matched sample (n=486)   |                          |          |
|---------------------------------|--------------------------|--------------------------|----------|--------------------------|--------------------------|----------|
|                                 | Reduced dose<br>N=392    | Full dose<br>N=289       | Std diff | Reduced dose<br>N=243    | Full dose<br>N=243       | Std diff |
| Age                             | 65.5±12.1<br>66 (58, 74) | 62.1±11.1<br>63 (57, 70) | 0.295    | 62.7±11.8<br>63 (56, 71) | 62.9±10.9<br>64 (58, 71) | 0.016    |
| Female                          | 87 (22.2)                | 47 (16.3)                | 0.151    | 43 (17.7)                | 44 (18.1%)               | 0.011    |
| Ethnicity (Other vs rest*)      | 234 (59.7)               | 197 (68.2)               | 0.177    | 159 (65.4)               | 159 (65.4)               | 0.000    |
| Hepatitis B                     | 136 (34.7)               | 93 (32.2)                | 0.053    | 81 (33.3)                | 78 (32.1)                | 0.026    |
| Hepatitis C                     | 124 (31.6)               | 85 (29.4)                | 0.048    | 76 (31.3)                | 73 (30.0)                | 0.027    |
| Alcohol related                 | 84 (21.4)                | 75 (26.0)                | 0.107    | 62 (25.5)                | 61 (25.1)                | 0.009    |
| None Etiology                   | 65 (16.6)                | 47 (16.3)                | 0.009    | 39 (16.1)                | 42 (17.3)                | 0.033    |
| Liver cirrhosis                 | 275 (70.2)               | 205 (70.9)               | 0.017    | 170 (70.0)               | 171 (70.4)               | 0.009    |
| ECOG PS (0/1 vs rest*)          | 344 (78.8)               | 251 (86.9)               | 0.027    | 215 (88.5)               | 207 (85.2)               | 0.097    |
| Child Pugh (A vs rest*)         | 330 (84.2)               | 255 (88.2)               | 0.118    | 215 (88.5)               | 210 (86.4)               | 0.062    |
| PVT (yes vs rest*)              | 159 (40.6)               | 113 (39.1)               | 0.030    | 101 (41.6)               | 94 (38.7)                | 0.059    |
| T stage (1/2 vs rest*)          | 139 (35.5)               | 86 (29.8)                | 0.122    | 74 (30.5)                | 77 (31.7)                | 0.027    |
| N stage (N0 vs rest*)           | 263 (67.1)               | 186 (64.4)               | 0.058    | 159 (65.4)               | 155 (63.8)               | 0.034    |
| M stage (M0 vs rest*)           | 200 (51.0)               | 152 (52.6)               | 0.032    | 129 (53.1)               | 124 (51.0)               | 0.041    |
| Tumor extension (>50% vs rest*) | 113 (28.8)               | 93 (32.2)                | 0.073    | 81 (33.3)                | 77 (31.7)                | 0.035    |
| Liver resection                 | 89 (22.7)                | 74 (25.6)                | 0.068    | 63 (25.9)                | 54 (22.2)                | 0.087    |
| Tumor ablation                  | 98 (25.0)                | 50 (17.3)                | 0.189    | 47 (19.3)                | 43 (17.7)                | 0.042    |
| TACE                            | 156 (39.8)               | 71 (24.6)                | 0.330    | 66 (27.2)                | 68 (28.0)                | 0.018    |
| TARE                            | 8 (2.0)                  | 14 (4.8)                 | 0.154    | 6 (2.5)                  | 11 (4.5)                 | 0.112    |
| SBRT                            | 31 (7.9)                 | 6 (2.1)                  | 0.270    | 6 (2.5)                  | 6 (2.5)                  | 0.000    |
| Alcohol Injection               | 15 (3.8)                 | 9 (3.1)                  | 0.039    | 7 (2.9)                  | 7 (2.9)                  | 0.000    |
| Liver transplant                | 21 (5.4)                 | 12 (4.2)                 | 0.057    | 11 (4.5)                 | 10 (4.1)                 | 0.020    |

Abbreviations: ECOG PS, Eastern Cooperative Oncology Group performance status; PVT, portal vein thrombosis; SBRT, stereotactic body radiation; Std diff, Standardized difference; TACE, trans-arterial chemoembolization; TARE, trans-arterial radioembolization;

\*Unknown were included under the rest group.

**Appendix Figure A.1: Distribution of PS in the original sample before matching**

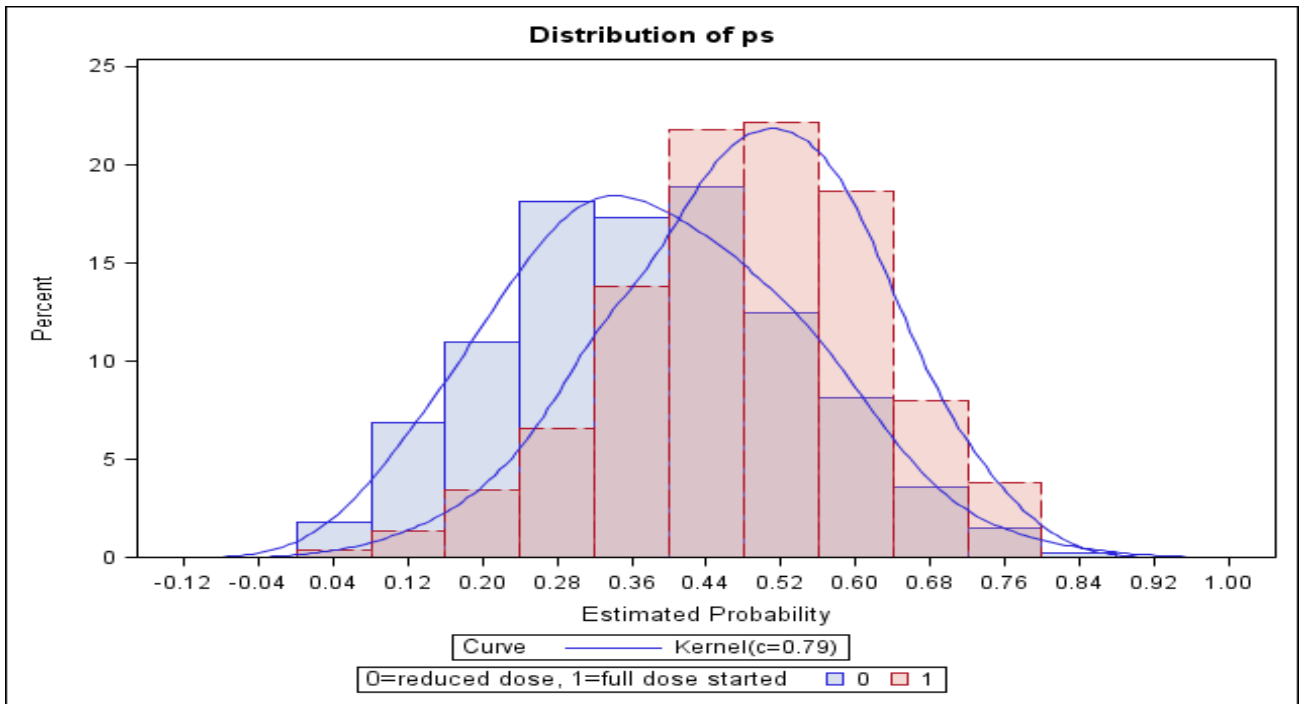

**Appendix Figure A.2: Distribution of PS in the matched sample**

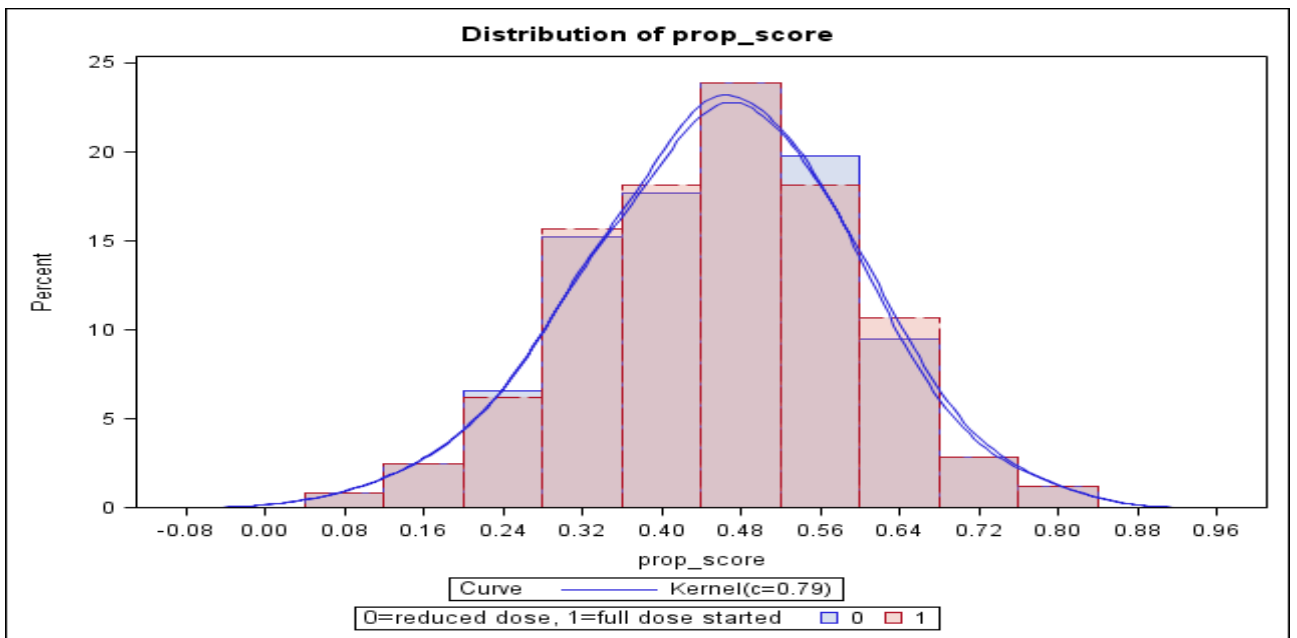

**Appendix Table B: Standardized differences in the weighted IPTW sample**

| <b>Variable</b>                  | <b>Std diff</b> |
|----------------------------------|-----------------|
| <b>Age</b>                       | 0.0174          |
| <b>Female</b>                    | 0.0146          |
| <b>Ethnicity</b>                 | 0.0116          |
| <b>Hepatitis B</b>               | 0.0075          |
| <b>Hepatitis C</b>               | 0.0284          |
| <b>Alcohol related</b>           | 0.0056          |
| <b>None Etiology</b>             | 0.0058          |
| <b>Liver cirrhosis</b>           | 0.0018          |
| <b>ECOG 0/1</b>                  | 0.0003          |
| <b>Child Pugh A</b>              | 0.0314          |
| <b>PVT (yes)</b>                 | 0.0295          |
| <b>T stage (1/2)</b>             | 0.0122          |
| <b>N stage (N0)</b>              | 0.0122          |
| <b>M stage (M0)</b>              | 0.0162          |
| <b>Tumor extension (&gt;50%)</b> | 0.0162          |
| <b>Liver resection</b>           | 0.0150          |
| <b>Tumor ablation</b>            | 0.0327          |
| <b>TACE</b>                      | 0.0151          |
| <b>TARE</b>                      | 0.0067          |
| <b>SBRT</b>                      | 0.0454          |
| <b>Alcohol Injection</b>         | 0.0182          |
| <b>Liver transplant</b>          | 0.0210          |

**Appendix Table C: Comparison between unadjusted and adjusted weighted IPTW sample**

|                                                      | <50%<br>(n=304) | 50-75%<br>(n=163) | >75%<br>(n=214) | Chis<br>q p | IPTW<br>Weigh<br>ted<br><50% | IPTW<br>Weigh<br>ted<br>50-<br>75% | IPTW<br>Weigh<br>ted<br>>75% | IPTW<br>weighted<br>chisq p |
|------------------------------------------------------|-----------------|-------------------|-----------------|-------------|------------------------------|------------------------------------|------------------------------|-----------------------------|
| <b>Age<br/>(median)</b>                              | 65              | 66                | 62              | <.00<br>1   | 64                           | 64                                 | 64                           | 0.97                        |
| <b>female</b>                                        | 64<br>(21.1)    | 30<br>(18.4)      | 40<br>(18.7)    | 0.72        | 20.4                         | 20.2                               | 21.7                         | 0.91                        |
| <b>Ethnicity<br/>(other vs<br/>rest)</b>             | 181<br>(59.5)   | 107<br>(65.6)     | 143<br>(66.8)   | 0.18        | 64.1                         | 61.7                               | 63.8                         | 0.86                        |
| <b>Hepatitis B</b>                                   | 106<br>(34.9)   | 53<br>(32.5)      | 70<br>(32.7)    | 0.83        | 33.0                         | 34.1                               | 34.2                         | 0.95                        |
| <b>Hepatitis C</b>                                   | 99<br>(32.6)    | 50<br>(30.7)      | 60<br>(28.0)    | 0.55        | 31.4                         | 30.1                               | 31.3                         | 0.96                        |
| <b>Alcohol<br/>related</b>                           | 55<br>(18.1)    | 48<br>(29.5)      | 56<br>(26.2)    | 0.01        | 23.2                         | 23.5                               | 23.6                         | 0.99                        |
| <b>None<br/>Etiology</b>                             | 56<br>(18.4)    | 23<br>(14.1)      | 33<br>(15.4)    | 0.43        | 16.8                         | 15.8                               | 15.2                         | 0.88                        |
| <b>Liver<br/>cirrhosis</b>                           | 203<br>(66.8)   | 128<br>(78.5)     | 149<br>(69.6)   | 0.03        | 69.9                         | 71.5                               | 70.0                         | 0.92                        |
| <b>ECGO PS<br/>(0/1 vs<br/>rest)</b>                 | 257<br>(84.4)   | 147<br>(90.2)     | 191<br>(89.3)   | 0.13        | 87.3                         | 87.7                               | 87.3                         | 0.99                        |
| <b>Child Pugh<br/>(A vs rest)</b>                    | 254<br>(83.6)   | 143<br>(87.7)     | 188<br>(87.9)   | 0.29        | 85.6                         | 86.1                               | 86.0                         | 0.98                        |
| <b>PVT (yes<br/>vs rest)</b>                         | 118<br>(38.8)   | 59<br>(36.2)      | 95<br>(44.4)    | 0.24        | 39.5                         | 38.4                               | 41.2                         | 0.85                        |
| <b>Tstage (1/2<br/>vs rest)</b>                      | 108<br>(35.5)   | 53<br>(32.5)      | 64<br>(29.9)    | 0.40        | 32.8                         | 35.6                               | 31.5                         | 0.70                        |
| <b>Nstage (N0<br/>vs rest)</b>                       | 207<br>(68.1)   | 109<br>(66.9)     | 133<br>(62.2)   | 0.36        | 67.4                         | 64.5                               | 66.8                         | 0.81                        |
| <b>Mstage (M0<br/>vs rest)</b>                       | 159<br>(52.3)   | 92<br>(56.4)      | 101<br>(47.2)   | 0.20        | 50.9                         | 50.1                               | 50.1                         | 0.98                        |
| <b>Tumor<br/>extension<br/>(&gt;50% vs<br/>rest)</b> | 97<br>(31.9)    | 45<br>(27.6)      | 64<br>(29.9)    | 0.62        | 30.3                         | 28.5                               | 32.6                         | 0.68                        |
| <b>Liver<br/>resection</b>                           | 76<br>(25.0)    | 37<br>(22.7)      | 50<br>(23.4)    | 0.83        | 24.1                         | 24.9                               | 23.8                         | 0.96                        |
| <b>Tumor<br/>ablation</b>                            | 78<br>(25.7)    | 33<br>(20.3)      | 37<br>(17.3)    | 0.07        | 21.3                         | 22.2                               | 21.6                         | 0.97                        |
| <b>TACE</b>                                          | 115<br>(37.8)   | 57<br>(35.0)      | 55<br>(25.7)    | 0.01<br>4   | 33.2                         | 34.0                               | 32.8                         | 0.97                        |
| <b>TARE</b>                                          | 6 (2.0)         | 6 (3.7)           | 10 (4.7)        | 0.22        | 3.7                          | 3.5                                | 3.5                          | 0.99                        |

|                          |          |          |          |      |     |     |     |      |
|--------------------------|----------|----------|----------|------|-----|-----|-----|------|
| <b>SBRT</b>              | 21 (6.9) | 9 (5.5)  | 7 (3.3)  | 0.20 | 5.7 | 5.3 | 6.5 | 0.88 |
| <b>Alcohol Injection</b> | 12 (4.0) | 5 (3.1)  | 7 (3.3)  | 0.86 | 3.1 | 3.0 | 2.9 | 0.99 |
| <b>Liver transplant</b>  | 1. (4.3) | 10 (6.1) | 10 (4.7) | 0.67 | 4.4 | 5.0 | 4.6 | 0.96 |

Abbreviations: ECOG PS, Eastern Cooperative Oncology Group performance status; PVT, portal vein thrombosis; SBRT, stereotactic body radiation; Std diff, Standardized difference; TACE, trans-arterial chemoembolization; TARE, trans-arterial radioembolization;

**Appendix Table D: Observed adverse events**

**(A) Starting dose**

| <b>Adverse Event</b>      | <b>Dose reduced<br/>n (%)<br/>N=392</b> | <b>Full dose<br/>n (%)<br/>N=289</b> | <b>P</b> |
|---------------------------|-----------------------------------------|--------------------------------------|----------|
| <b>Any Toxicity</b>       | 329 (84%)                               | 257 (89%)                            | 0.063    |
| <b>Hypertension</b>       | 55 (14%)                                | 40 (14%)                             | 0.944    |
| <b>Fatigue</b>            | 242 (62%)                               | 191 (66%)                            | 0.243    |
| <b>Rash</b>               | 106 (27%)                               | 91 (31%)                             | 0.206    |
| <b>Hand-foot syndrome</b> | 95 (24%)                                | 102 (35%)                            | 0.002    |
| <b>Headache</b>           | 11 (3%)                                 | 7 (2%)                               | 0.758    |
| <b>Diarrhea</b>           | 150 (38%)                               | 116 (40%)                            | 0.620    |
| <b>Mucositis</b>          | 31 (8%)                                 | 41 (14%)                             | 0.008    |
| <b>Alopecia</b>           | 29 (7%)                                 | 27 (9%)                              | 0.361    |
| <b>Weight loss</b>        | 97 (25%)                                | 84 (29%)                             | 0.207    |
| <b>Anorexia</b>           | 144 (37%)                               | 99 (34%)                             | 0.505    |

**(B) Dose-intensity**

| <b>Adverse Event</b>      | <b>&lt; 50%<br/>n (%)<br/>N=304</b> | <b>50-75%<br/>n (%)<br/>N=163</b> | <b>&gt;75 %<br/>n (%)<br/>N= 214</b> | <b>P</b> |
|---------------------------|-------------------------------------|-----------------------------------|--------------------------------------|----------|
| <b>Any Toxicity</b>       | 242 (80%)                           | 159 (97%)                         | 185 (86%)                            | <0.001   |
| <b>Hypertension</b>       | 38 (12%)                            | 28 (17%)                          | 29 (13%)                             | 0.372    |
| <b>Fatigue</b>            | 177 (58%)                           | 120 (74%)                         | 136 (63%)                            | 0.004    |
| <b>Rash</b>               | 82 (27%)                            | 60 (37%)                          | 55 (26%)                             | 0.037    |
| <b>Hand-foot syndrome</b> | 67 (22%)                            | 77 (47%)                          | 53 (25%)                             | <0.001   |
| <b>Headache</b>           | 8 (3%)                              | 8 (5%)                            | 2 (1%)                               | 0.059    |
| <b>Diarrhea</b>           | 101(33%)                            | 77 (47%)                          | 88 (41%)                             | 0.009    |
| <b>Mucositis</b>          | 27 (9%)                             | 26 (16%)                          | 19 (9%)                              | 0.038    |
| <b>Alopecia</b>           | 11 (4%)                             | 24 (15%)                          | 21 (10%)                             | <0.001   |
| <b>Weight loss</b>        | 65 (21%)                            | 58 (36%)                          | 58 (27%)                             | 0.004    |
| <b>Anorexia</b>           | 112 (37%)                           | 63 (39%)                          | 68 (32%)                             | 0.328    |
